# Supplementary material
Source: publisher figshare collection journal article supplement (https://frontiersin.figshare.com/ndownloader/files/12471053)
Supplement: Supplementary file [file 12471053]

**Table S1** – Gender, age at time of sample, diagnosis, collection date, samples source and molecular identification of the 227 clinical isolates of *Aspergillus* species from three hospitals in the North of Portugal, collected between 2010-2016.

| Strain ID | Gender | Age at time of sample | Diagnosis                             | Collection date | Sample source  | Molecular ID               |
|-----------|--------|-----------------------|---------------------------------------|-----------------|----------------|----------------------------|
| HSP1-C1   | M      | 63                    | Aspergilloma                          | 01/06/2010      | BA             | <i>A. terreus</i>          |
| HSP1-C2   | F      | 78                    | Peritonitis                           | 16/10/2011      | BAL            | <i>A. welwitschiae</i>     |
| HSP1-C3   | M      | 88                    | Chronic obstructive pulmonary disease | 22/12/2011      | S              | <i>A. niger</i>            |
| HSP1-C4   | F      | 63                    | Respiratory infection                 | 22/08/2012      | BAL            | <i>A. welwitschiae</i>     |
| HSP1-C5   | F      | 56                    | Hepatic transplant                    | 18/09/2012      | S              | <i>A. fumigatus</i>        |
| HSP1-C6   | M      | 45                    | Sarcoidosis                           | 31/07/2012      | S              | <i>A. fumigatus</i>        |
| HSP1-C7   | F      | 89                    | Congestive heart failure              | 15/05/2013      | BAL            | <i>A. terreus</i>          |
| HSP1-C8   | M      | 60                    | Renal transplant                      | 13/05/2013      | S              | <i>A. fumigatus</i>        |
| HSP1-C9   | F      | 73                    | Breast cancer                         | 20/05/2013      | S              | <i>A. flavus/A. oryzae</i> |
| HSP1-C10  | M      | 57                    | Renal transplant                      | 27/09/2013      | S              | <i>A. fumigatus</i>        |
| HSP1-C11  | M      | 38                    | Cystic fibrosis                       | 07/11/2013      | S              | <i>A. fumigatus</i>        |
| HSP1-C12  | M      | 63                    | Chronic obstructive pulmonary disease | 28/01/2014      | S              | <i>A. flavus/A. oryzae</i> |
| HSP1-C13  | =C12   |                       |                                       | 28/01/2014      |                | <i>A. fumigatus</i>        |
| HSP1-C14  | F      | 80                    | Respiratory infection                 | 21/03/2014      | S              | <i>A. fumigatus</i>        |
| HSP1-C15  | M      | 45                    | Silicosis                             | 18/11/2014      | BAL            | <i>A. fumigatus</i>        |
| HSP1-C16  | F      | 48                    | Hepatic transplant                    | 01/12/2014      | BAL            | <i>A. lentulus</i>         |
| HSP1-C17  | F      | 59                    | Aspergilloma                          | 03/12/2014      | BAL            | <i>A. fumigatus</i>        |
| HSP1-C18  | F      | 23                    | Cystic fibrosis                       | 23/12/2014      | S              | <i>A. fumigatus</i>        |
| HSP1-C19  | M      | 64                    | Chronic obstructive pulmonary disease | 16/01/2015      | S              | <i>A. fumigatus</i>        |
| HSP1-C20  | M      | 60                    | Hepatic transplant                    | 19/01/2015      | S              | <i>A. fumigatus</i>        |
| HSP1-C21  | F      | 9                     | Cystic fibrosis                       | 26/01/2015      | S              | <i>A. fumigatus</i>        |
| HSP1-C26  | =C21   |                       |                                       | 18/05/2015      | S              | <i>A. fumigatus</i>        |
| HSP1-C40  | =C21   |                       |                                       | 07/09/2015      | S              | <i>A. fumigatus</i>        |
| HSP1-C22  | M      | 69                    | Chronic obstructive pulmonary disease | 06/02/2015      | S              | <i>A. fumigatus</i>        |
| HSP1-C23  | F      | 63                    | Hepatic transplant                    | 13/04/2015      | S              | <i>A. fumigatus</i>        |
| HSP1-C24  | F      | 11                    | Cystic fibrosis                       | 27/04/2015      | S              | <i>A. fumigatus</i>        |
| HSP1-C25  | M      | 16                    | Cystic fibrosis                       | 04/05/2015      | S              | <i>A. fumigatus</i>        |
| HSP1-C27  | M      | 76                    | Endophthalmitis                       | 01/06/2015      | Vitreous humor | <i>A. thermomutatus</i>    |
| HSP1-C28  | F      | 8                     | Cystic fibrosis                       | 08/06/2015      | S              | <i>A. fumigatus</i>        |
| HSP1-C29  | M      | 72                    | Renal transplant                      | 23/06/2015      | S              | <i>A. fumigatus</i>        |
| HSP1-C30  | F      | 10                    | Cystic fibrosis                       | 29/06/2015      | S              | <i>A. fumigatus</i>        |
| HSP1-C31  | F      | 61                    | Pneumonia                             | 11/07/2015      | BAL            | <i>A. fumigatus</i>        |
| HSP1-C32  | M      | 47                    | Sepsis                                | 20/07/2015      | S              | <i>A. fumigatus</i>        |
| HSP1-C33  | F      | 57                    | Sepsis                                | 16/08/2015      | S              | <i>A. terreus</i>          |
| HSP1-C34  | M      | 62                    | Prolymphocytic leukemia               | 27/08/2015      | S              | <i>A. fumigatus</i>        |
| HSP1-C35  | F      | 69                    | Bronchiectasis                        | 09/09/2015      | BA             | <i>A. fumigatus</i>        |
| HSP1-C36  | F      | 81                    | Pneumonia                             | 27/07/2015      | BAL            | <i>A. fumigatus</i>        |
| HSP1-C37  | M      | 63                    | Renal transplant                      | 01/08/2015      | BAL            | <i>A. fumigatus</i>        |
| HSP1-C38  | M      | 78                    | Vascular graft infection              | 29/09/2015      | BA             | <i>A. fumigatus</i>        |
| HSP1-C39  | F      | 74                    | Vitreous fibrovascular organization   | 22/09/2015      | Vitreous humor | <i>A. fumigatus</i>        |
| HSP1-C41  | M      | 14                    | Cystic fibrosis                       | 14/09/2015      | S              | <i>A. flavus/A. oryzae</i> |
| HSP2-C4   | M      | 77                    | Meningioma                            | 28/11/2013      | EA             | <i>A. fumigatus</i>        |
| HSP2-C1   | =C4    |                       |                                       | 22/12/2013      | EA             | <i>A. fumigatus</i>        |
| HSP2-C2   | F      | 69                    | Lung transplant                       | 30/12/2013      | EA             | <i>A. fumigatus</i>        |
| HSP2-C3   | F      | 77                    | Spiegelhernia surgery=C38             | 02/10/2013      | EA             | <i>A. fumigatus</i>        |
| HSP2-C20  | =C3    |                       |                                       | 02/10/2013      |                | <i>A. welwitschiae</i>     |
| HSP2-C5   | M      | 57                    | Type 2 diabetes                       | 16/04/2014      | BL             | <i>A. fumigatus</i>        |
| HSP2-C6   | M      | 81                    | Prostate carcinoma                    | 02/09/2011      | S              | <i>A. fumigatus</i>        |
| HSP2-C7   | M      | 67                    | Adrenal carcinoma                     | 28/05/2013      | S              | <i>A. fumigatus</i>        |
| HSP2-C8   | F      | 56                    | Acute respiratory distress syndrome   | 24/06/2013      | EA             | <i>A. fumigatus</i>        |
| HSP2-C38  | M      | 63                    | Renal transplant                      | 19/02/2010      | EA             | <i>A. fumigatus</i>        |
| HSP2-C9   | =C38   |                       |                                       | 18/02/2012      | EA             | <i>A. fumigatus</i>        |
| HSP2-C10  | F      | 79                    | Bronchiectasis                        | 06/05/2011      | S              | <i>A. fumigatus</i>        |
| HSP2-C11  | F      | 80                    | Otitis                                | 02/06/2011      | Ear exudate    | <i>A. fumigatus</i>        |
| HSP2-C12  | F      | 83                    | ANCA-Positive vasculitis              | 04/10/2011      | BL             | <i>A. fumigatus</i>        |
| HSP2-C13  | M      | 72                    | Osteomyelitis                         | 13/05/2011      | BL             | <i>A. fumigatus</i>        |
| HSP2-C14  | F      | 65                    | Pneumonia                             | 27/03/2013      | BAL            | <i>A. fumigatus</i>        |
| HSP2-C15  | F      | 51                    | Amyloidosis                           | 16/04/2014      | S              | <i>A. fumigatus</i>        |

|          |      |     |                                         |            |                          |                            |
|----------|------|-----|-----------------------------------------|------------|--------------------------|----------------------------|
| HSP2-C16 | F    | 39  | Maxillary sinusitis                     | 07/08/2013 | Maxillary sinus drainage | <i>A. fumigatus</i>        |
| HSP2-C17 | M    | 78  | Chronic myeloid leukemia                | 11/04/2014 | EA                       | <i>A. fumigatus</i>        |
| HSP2-C18 | M    | 71  | Colon carcinoma                         | 25/08/2013 | EA                       | <i>A. fumigatus</i>        |
| HSP2-C23 | =C18 |     |                                         | 25/08/2013 |                          | <i>A. flavus/A. oryzae</i> |
| HSP2-C22 | =C18 |     |                                         | 02/09/2013 | EA                       | <i>A. flavus/A. oryzae</i> |
| HSP2-C19 | M    | 65  | Burn wound infection                    | 22/10/2011 | EA                       | <i>A. lentulus</i>         |
| HSP2-C26 | M    | 64  | Esophageal rupture                      | 05/01/2011 | EA                       | <i>A. flavus/A. oryzae</i> |
| HSP2-C21 | =C26 |     |                                         | 16/01/2011 | Mediastinal drainage     | <i>A. welwitschiae</i>     |
| HSP2-C27 | F    | 29  | Acute lymphoblastic leukemia            | 24/10/2013 | EA                       | <i>A. flavus/A. oryzae</i> |
| HSP2-C25 | =C27 |     |                                         | 14/11/2013 | BL                       | <i>A. flavus/A. oryzae</i> |
| HSP2-C28 | F    | 12  | Cystic fibrosis                         | 20/10/2014 | S                        | <i>A. fumigatus</i>        |
| HSP2-C29 | M    | 49  | Peritonitis                             | 19/11/2014 | S                        | <i>A. fumigatus</i>        |
| HSP2-C30 | M    | 43  | Cirrhosis                               | 18/12/2014 | S                        | <i>A. fumigatus</i>        |
| HSP2-C31 | M    | 19  | Cystic fibrosis                         | 20/04/2010 | S                        | <i>A. fumigatus</i>        |
| HSP2-C32 | F    | 54  | Bronchiectasis                          | 01/07/2010 | BAL                      | <i>A. fumigatus</i>        |
| HSP2-C33 | M    | 82  | Pancreatitis                            | 23/12/2011 | S                        | <i>A. fumigatus</i>        |
| HSP2-C41 | =C33 |     |                                         | 23/12/2011 |                          | <i>A. terreus</i>          |
| HSP2-C34 | M    | 52  | Lung transplant                         | 11/10/2010 | S                        | <i>A. fumigatus</i>        |
| HSP2-C35 | F    | 67  | Bronchiectasis                          | 21/06/2011 | S                        | <i>A. fumigatus</i>        |
| HSP2-C36 | F    | 16  | Cystic fibrosis                         | 06/05/2010 | S                        | <i>A. fumigatus</i>        |
| HSP2-C37 | F    | 21  | Cystic fibrosis                         | 20/10/2014 | S                        | <i>A. fumigatus</i>        |
| HSP2-C39 | M    | 38  | Burn wound infection                    | 03/09/2010 | Burn wound exudate       | <i>A. fumigatus</i>        |
| HSP2-C40 | M    | 67  | Renal transplant                        | 28/10/2013 | BL                       | <i>A. fumigatus</i>        |
| HSP2-C42 | M    | 78  | Cardiothoracic surgery                  | 16/04/2010 | EA                       | <i>A. fumigatus</i>        |
| HSP2-C43 | F    | 37  | Cystic fibrosis                         | 07/03/2012 | S                        | <i>A. fumigatus</i>        |
| HSP2-C44 | M    | 55  | Traumatic brain injury                  | 09/04/2010 | S                        | <i>A. fumigatus</i>        |
| HSP2-C45 | F    | 62  | Tuberculosis                            | 18/10/2011 | EA                       | <i>A. fumigatus</i>        |
| HSP2-C46 | F    | 76  | Colon carcinoma                         | 01/10/2014 | EA                       | <i>A. fumigatus</i>        |
| HSP2-C47 | F    | 77  | Bronchiectasis                          | 13/07/2010 | S                        | <i>A. fumigatus</i>        |
| HSP2-C48 | F    | 18  | Cystic fibrosis                         | 28/06/2010 | S                        | <i>A. fumigatus</i>        |
| HSP2-C49 | F    | 75  | Renal transplant                        | 28/12/2014 | S                        | <i>A. fumigatus</i>        |
| HSP2-C50 | F    | 47  | Bronchiectasis                          | 11/11/2014 | Pleural fluid            | <i>A. fumigatus</i>        |
| HSP2-C51 | F    | 75  | Bronchiectasis                          | 27/06/2011 | S                        | <i>A. fumigatus</i>        |
| HSP2-C52 | M    | 36  | Burn wound infection                    | 08/10/2011 | S                        | <i>A. fumigatus</i>        |
| HSP2-C53 | F    | 11  | Cystic fibrosis                         | 20/10/2014 | S                        | <i>A. fumigatus</i>        |
| HSP2-C54 | F    | 76  | Bronchiectasis                          | 26/08/2010 | S                        | <i>A. fumigatus</i>        |
| HSP2-C55 | F    | 8   | Cystic fibrosis                         | 06/10/2011 | S                        | <i>A. fumigatus</i>        |
| HSP2-C56 | F    | 0.5 | Cystic fibrosis                         | 13/07/2010 | S                        | <i>A. fumigatus</i>        |
| HSP2-C57 | F    | 35  | Cystic fibrosis                         | 17/05/2010 | S                        | <i>A. fumigatus</i>        |
| HSP2-C58 | M    | 81  | Lung adenocarcinoma                     | 05/01/2012 | S                        | <i>A. fumigatus</i>        |
| HSP2-C59 | M    | 77  | Rheumatoid arthritis                    | 24/08/2010 | S                        | <i>A. fumigatus</i>        |
| HSP2-C60 | M    | 61  | Thoracic surgery                        | 11/03/2015 | Pleural fluid            | <i>A. fumigatus</i>        |
| HSP2-C64 | =C60 |     |                                         | 30/04/2015 | Pleural fluid            | <i>A. fumigatus</i>        |
| HSP2-C61 | M    | 69  | Pneumonia                               | 06/11/2014 | BL                       | <i>A. welwitschiae</i>     |
| HSP2-C62 | F    | 37  | Bronchiectasis                          | 02/03/2015 | S                        | <i>A. fumigatus</i>        |
| HSP2-C63 | F    | 12  | Cystic fibrosis                         | 05/03/2015 | S                        | <i>A. fumigatus</i>        |
| HSP2-C65 | F    | 63  | Sepsis                                  | 19/05/2015 | S                        | <i>A. flavus/A. oryzae</i> |
| HSP2-C66 | M    | 47  | Lung transplant                         | 20/05/2015 | S                        | <i>A. fumigatus</i>        |
| HSP2-C67 | M    | 45  | Tuberculosis                            | 27/07/2015 | S                        | <i>A. fumigatus</i>        |
| HSP2-C68 | F    | 22  | Cystic fibrosis                         | 07/08/2015 | S                        | <i>A. fumigatus</i>        |
| HSP2-C69 | F    | 85  | ANCA-Positive vasculitis                | 14/12/2015 | S                        | <i>A. fumigatus</i>        |
| HSP2-C70 | F    | 57  | Acute myeloid leukemia                  | 19/01/2016 | EA                       | <i>A. fumigatus</i>        |
| HSP2-C71 | M    | 60  | Acute respiratory distress syndrome     | 26/01/2016 | EA                       | <i>A. fumigatus</i>        |
| HSP2-C72 | M    | 74  | Non-Hodgkin lymphoma                    | 18/02/2016 | S                        | <i>A. flavus/A. oryzae</i> |
| HSP2-C73 | M    | 64  | Allergic bronchopulmonary aspergillosis | 19/02/2016 | S                        | <i>A. fumigatus</i>        |
| HSP2-C74 | M    | 54  | Renal transplant                        | 19/02/2016 | S                        | <i>A. flavus/A. oryzae</i> |
| HSP2-C75 | M    | 58  | Acute respiratory distress syndrome     | 16/03/2016 | EA                       | <i>A. welwitschiae</i>     |
| HSP2-C76 | M    | 60  | Pulmonary infiltrates                   | 01/02/2016 | Lung biopsy              | <i>A. sydowii</i>          |
| HSP2-C77 | F    | 81  | Peritonitis                             | 02/10/2014 | S                        | <i>A. lentulus</i>         |
| HSP3-C1  | F    | 54  | Chronic lymphoid leukemia               | 09/01/2013 | S                        | <i>A. fumigatus</i>        |
| HSP3-C2  | M    | 45  | Allogeneic bone marrow transplant       | 06/05/2013 | S                        | <i>A. fumigatus</i>        |
| HSP3-C3  | M    | 72  | Pneumonia                               | 23/05/2013 | EA                       | <i>A. fumigatus</i>        |
| HSP3-C5  | F    | 55  | Chronic lymphoid leukemia               | 04/07/2013 | S                        | <i>A. fumigatus</i>        |
| HSP3-C6  | F    | 57  | Breast cancer                           | 04/07/2013 | EA                       | <i>A. fumigatus</i>        |

|          |      |    |                                       |            |         |                            |
|----------|------|----|---------------------------------------|------------|---------|----------------------------|
| HSP3-C7  | M    | 75 | Pneumonia                             | 04/07/2013 | S       | <i>A. fumigatus</i>        |
| HSP3-C8  | M    | 76 | Primary hepatocellular carcinoma      | 06/07/2013 | S       | <i>A. fumigatus</i>        |
| HSP3-C9  | M    | 60 | Myelofibrosis                         | 16/07/2013 | BL      | <i>A. fumigatus</i>        |
| HSP3-C10 | M    | 59 | Pneumonia                             | 18/07/2013 | S       | <i>A. fumigatus</i>        |
| HSP3-C11 | F    | 74 | Chronic lymphoid leukemia             | 19/07/2013 | S       | <i>A. fumigatus</i>        |
| HSP3-C12 | M    | 61 | Pulmonary nodule                      | 19/07/2013 | BL      | <i>A. fumigatus</i>        |
| HSP3-C13 | M    | 38 | Non-Hodgkin lymphoma                  | 25/07/2013 | S       | <i>A. fumigatus</i>        |
| HSP3-C14 | F    | 70 | Breast cancer                         | 29/07/2013 | BL      | <i>A. fumigatus</i>        |
| HSP3-C15 | M    | 82 | Colon cancer                          | 06/08/2013 | BL      | <i>A. fumigatus</i>        |
| HSP3-C16 | M    | 75 | Non-Hodgkin lymphoma                  | 30/08/2013 | BAL     | <i>A. fumigatus</i>        |
| HSP3-C17 | M    | 65 | Lung adenocarcinoma                   | 04/09/2013 | S       | <i>A. fumigatus</i>        |
| HSP3-C18 | M    | 66 | Lung adenocarcinoma                   | 27/09/2013 | BL      | <i>A. fumigatus</i>        |
| HSP3-C19 | M    | 75 | Colon cancer                          | 25/10/2013 | BL      | <i>A. fumigatus</i>        |
| HSP3-C20 | M    | 57 | Prostate carcinoma                    | 31/10/2013 | S       | <i>A. fumigatus</i>        |
| HSP3-C21 | F    | 75 | Gastric cancer                        | 17/11/2013 | EA      | <i>A. fumigatus</i>        |
| HSP3-C22 | M    | 68 | Acute myeloid leukemia                | 26/11/2013 | BAL     | <i>A. fumigatus</i>        |
| HSP3-C23 | F    | 78 | Lung adenocarcinoma                   | 14/12/2013 | S       | <i>A. fumigatus</i>        |
| HSP3-C24 | M    | 51 | Invasive aspergillosis                | 31/12/2013 | BL      | <i>A. flavus/A. oryzae</i> |
| HSP3-C25 | F    | 76 | Pulmonary nodule                      | 09/01/2014 | BL      | <i>A. fumigatus</i>        |
| HSP3-C26 | M    | 76 | Chronic lymphoid leukemia             | 09/01/2014 | BL      | <i>A. fumigatus</i>        |
| HSP3-C27 | M    | 51 | Hepatic failure                       | 09/01/2014 | S       | <i>A. fumigatus</i>        |
| HSP3-C28 | F    | 70 | Sarcoma                               | 28/01/2014 | BL      | <i>A. fumigatus</i>        |
| HSP3-C29 | M    | 21 | Acute myeloid leukemia                | 28/01/2014 | Fluids  | <i>A. fumigatus</i>        |
| HSP3-C30 | F    | 71 | Sarcoma                               | 03/03/2014 | EA      | <i>A. fumigatus</i>        |
| HSP3-C31 | M    | 62 | Lung adenocarcinoma                   | 08/05/2014 | BL      | <i>A. fumigatus</i>        |
| HSP3-C32 | M    | 57 | Chronic obstructive pulmonary disease | 30/05/2014 | S       | <i>A. fumigatus</i>        |
| HSP3-C33 | M    | 63 | Post chemotherapy neutropenia         | 04/07/2014 | S       | <i>A. fumigatus</i>        |
| HSP3-C34 | F    | 83 | Thyroid cancer                        | 16/07/2014 | BL      | <i>A. fumigatus</i>        |
| HSP3-C35 | M    | 83 | Lung adenocarcinoma                   | 16/07/2014 | S       | <i>A. fumigatus</i>        |
| HSP3-C36 | M    | 52 | Pneumonia                             | 16/07/2014 | S       | <i>A. fumigatus</i>        |
| HSP3-C37 | M    | 84 | Pneumonia                             | 21/07/2014 | BAL     | <i>A. fumigatus</i>        |
| HSP3-C38 | M    | 65 | Cervical cancer                       | 22/07/2014 | S       | <i>A. fumigatus</i>        |
| HSP3-C39 | M    | 54 | Tuberculosis                          | 22/07/2014 | S       | <i>A. fumigatus</i>        |
| HSP3-C40 | M    | 51 | Graft-versus-host disease             | 24/07/2014 | S       | <i>A. fumigatus</i>        |
| HSP3-C41 | M    | 62 | Non-Hodgkin lymphoma                  | 11/08/2014 | BL      | <i>A. fumigatus</i>        |
| HSP3-C42 | M    | 60 | Allogeneic bone marrow transplant     | 20/08/2014 | S       | <i>A. fumigatus</i>        |
| HSP3-C43 | M    | 35 | Acute myeloid leukemia                | 21/09/2014 | S       | <i>A. fumigatus</i>        |
| HSP3-C44 | F    | 65 | Mycetoma                              | 29/10/2014 | BAL     | <i>A. fumigatus</i>        |
| HSP3-C45 | M    | 41 | Acute lymphoid leukemia               | 04/11/2014 | S       | <i>A. fumigatus</i>        |
| HSP3-C46 | F    | 65 | Non-Hodgkin lymphoma                  | 11/11/2014 | BL      | <i>A. fumigatus</i>        |
| HSP3-C47 | F    | 57 | Non-Hodgkin lymphoma                  | 23/11/2014 | EA      | <i>A. fumigatus</i>        |
| HSP3-C48 | =C47 |    |                                       | 24/11/2014 | Biopsy  | <i>A. fumigatus</i>        |
| HSP3-C49 | M    | 62 | Pulmonary nodule                      | 28/11/2014 | BL      | <i>A. fumigatus</i>        |
| HSP3-C50 | F    | 59 | Pneumonitis                           | 01/12/2014 | BAL     | <i>A. fumigatus</i>        |
| HSP3-C51 | M    | 64 | Lung adenocarcinoma                   | 11/12/2014 | BL      | <i>A. fumigatus</i>        |
| HSP3-C52 | M    | 62 | Pulmonary nodule                      | 16/12/2014 | S       | <i>A. fumigatus</i>        |
| HSP3-C53 | F    | 80 | Atelectasis                           | 18/12/2014 | BL      | <i>A. fumigatus</i>        |
| HSP3-C54 | F    | 45 | Breast cancer                         | 03/04/2011 | S       | <i>A. fumigatus</i>        |
| HSP3-C56 | M    | 52 | Allogeneic bone marrow transplant     | 23/05/2011 | EA      | <i>A. lentulus</i>         |
| HSP3-C57 | M    | 49 | Lung adenocarcinoma                   | 27/05/2011 | BL      | <i>A. fumigatus</i>        |
| HSP3-C58 | M    | 74 | Sepsis                                | 02/06/2011 | S       | <i>A. fumigatus</i>        |
| HSP3-C59 | F    | 50 | Pneumonia                             | 03/06/2011 | S       | <i>A. fumigatus</i>        |
| HSP3-C61 | F    | 41 | Pulmonary nodule                      | 09/10/2011 | S       | <i>A. fumigatus</i>        |
| HSP3-C62 | M    | 79 | Pneumonia                             | 23/12/2011 | S       | <i>A. flavus/A. oryzae</i> |
| HSP3-C63 | M    | 69 | Chronic lymphoid leukemia             | 04/04/2012 | S       | <i>A. fumigatus</i>        |
| HSP3-C64 | F    | 73 | Chronic lymphoid leukemia             | 11/04/2012 | S       | <i>A. fumigatus</i>        |
| HSP3-C65 | F    | 79 | Non-Hodgkin lymphoma                  | 17/04/2012 | S       | <i>A. fumigatus</i>        |
| HSP3-C66 | M    | 60 | Acute kidney injury                   | 18/04/2012 | S       | <i>A. felis</i>            |
| HSP3-C67 | =C66 |    |                                       | 30/04/2012 | EA      | <i>A. fumigatus</i>        |
| HSP3-C68 | F    | 17 | Acute myeloid leukemia                | 02/05/2012 | S       | <i>A. fumigatus</i>        |
| HSP3-C69 | M    | 43 | Septic shock                          | 06/05/2012 | EA      | <i>A. fumigatus</i>        |
| HSP3-C70 | F    | 71 | Septic shock                          | 06/05/2012 | Exudate | <i>A. fumigatus</i>        |
| HSP3-C72 | M    | 43 | Gastric cancer                        | 19/07/2012 | S       | <i>A. fumigatus</i>        |
| HSP3-C73 | F    | 78 | Lung adenocarcinoma                   | 23/07/2012 | BL      | <i>A. fumigatus</i>        |
| HSP3-C74 | M    | 75 | Non-Hodgkin lymphoma                  | 26/07/2012 | S       | <i>A. fumigatus</i>        |

|           |       |    |                                   |            |              |                            |
|-----------|-------|----|-----------------------------------|------------|--------------|----------------------------|
| HSP3-C75  | M     | 86 | Pulmonary nodule                  | 27/07/2012 | BL           | <i>A. fumigatus</i>        |
| HSP3-C76  | M     | 56 | Renal carcinoma                   | 27/07/2012 | S            | <i>A. fumigatus</i>        |
| HSP3-C77  | M     | 59 | Acute kidney injury               | 28/07/2012 | S            | <i>A. fumigatus</i>        |
| HSP3-C78  | F     | 81 | Abdominal surgery                 | 24/08/2012 | S            | <i>A. fumigatus</i>        |
| HSP3-C79  | M     | 16 | Septic shock                      | 30/08/2012 | Biopsy       | <i>A. fumigatus</i>        |
| HSP3-C80  | M     | 46 | Cervical cancer                   | 05/09/2012 | S            | <i>A. fumigatus</i>        |
| HSP3-C81  | F     | 84 | Non-Hodgkin lymphoma              | 10/09/2012 | Exudate      | <i>A. fumigatus</i>        |
| HSP3-C83  | M     | 49 | Allogeneic bone marrow transplant | 01/10/2012 | S            | <i>A. fumigatus</i>        |
| HSP3-C84  | F     | 79 | Non-Hodgkin lymphoma              | 08/10/2012 | BL           | <i>A. fumigatus</i>        |
| HSP3-C85  | M     | 70 | Colon cancer                      | 06/11/2012 | BL           | <i>A. fumigatus</i>        |
| HSP3-C86  | M     | 21 | Non-Hodgkin lymphoma              | 08/01/2015 | S            | <i>A. fumigatus</i>        |
| HSP3-C87  | F     | 40 | Aplastic anemia                   | 09/01/2015 | S            | <i>A. fumigatus</i>        |
| HSP3-C88  | F     | 83 | Hemoptysis                        | 23/01/2015 | S            | <i>A. fumigatus</i>        |
| HSP3-C89  | F     | 51 | Acute myeloid leukemia            | 16/03/2015 | EA           | <i>A. fumigatus</i>        |
| HSP3-C90  | =C89  |    |                                   | 23/03/2015 | Biopsy       | <i>A. fumigatus</i>        |
| HSP3-C91  | M     | 70 | Chronic lymphoid leukemia         | 24/03/2015 | S            | <i>A. fumigatus</i>        |
| HSP3-C92  | M     | 40 | Allogeneic bone marrow transplant | 30/03/2015 | S            | <i>A. fumigatus</i>        |
| HSP3-C93  | F     | 79 | Sepsis                            | 01/04/2015 | S            | <i>A. fumigatus</i>        |
| HSP3-C94  | =C93  |    |                                   | 01/04/2015 |              | <i>A. fumigatus</i>        |
| HSP3-C95  | M     | 49 | Chronic lymphoid leukemia         | 06/04/2015 | BAL          | <i>A. fumigatus</i>        |
| HSP3-C96  | =C95  |    |                                   | 06/04/2015 | Biopsy       | <i>A. fumigatus</i>        |
| HSP3-C97  | F     | 63 | Cervical cancer                   | 07/04/2015 | S            | <i>A. fumigatus</i>        |
| HSP3-C98  | M     | 40 | Allogeneic bone marrow transplant | 08/04/2015 | S            | <i>A. fumigatus</i>        |
| HSP3-C99  | F     | 60 | Non-Hodgkin lymphoma              | 21/04/2015 | S            | <i>A. fumigatus</i>        |
| HSP3-C100 | =C99  |    |                                   | 21/04/2015 |              | <i>A. fumigatus</i>        |
| HSP3-C101 | F     | 6  | Allogeneic bone marrow transplant | 23/04/2015 | S            | <i>A. fumigatus</i>        |
| HSP3-C102 | M     | 37 | Myelodysplastic syndrome          | 30/04/2015 | EA           | <i>A. fumigatus</i>        |
| HSP3-C103 | F     | 66 | Non-Hodgkin lymphoma              | 20/05/2015 | S            | <i>A. fumigatus</i>        |
| HSP3-C104 | M     | 21 | Acute lymphoid leukemia           | 30/06/2015 | S            | <i>A. welwitschiae</i>     |
| HSP3-C105 | M     | 71 | Non-Hodgkin lymphoma              | 09/07/2015 | S            | <i>A. nidulans</i>         |
| HSP3-C106 | F     | 55 | Pulmonary nodule                  | 10/07/2015 | BAL          | <i>A. fumigatus</i>        |
| HSP3-C107 | M     | 57 | Esophagal carcinoma               | 22/07/2015 | S            | <i>A. fumigatus</i>        |
| HSP3-C108 | =C107 |    |                                   | 22/07/2015 |              | <i>A. flavus/A. oryzae</i> |
| HSP3-C109 | F     | 55 | Hodgkin lymphoma                  | 24/07/2015 | S            | <i>A. fumigatus</i>        |
| HSP3-C110 | M     | 56 | Cervical cancer                   | 27/07/2015 | S            | <i>A. lentulus</i>         |
| HSP3-C111 | M     | 52 | Acute lymphoid leukemia           | 02/09/2015 | S            | <i>A. fumigatus</i>        |
| HSP3-C112 | M     | 62 | Cervical cancer                   | 09/09/2015 | Oral exudate | <i>A. fumigatus</i>        |
| HSP3-C113 | F     | 68 | Myelofibrosis                     | 09/11/2015 | S            | <i>A. pseudodeflectus</i>  |
| HSP3-C114 | =C113 |    |                                   | 17/11/2015 | BL           | <i>A. pseudodeflectus</i>  |
| HSP3-C115 | F     | 95 | Bladder cancer                    | 01/12/2015 | S            | <i>A. fumigatus</i>        |

HSP1-CHP; HSP2-CHSJ; HSP3-IPO; S-sputum; BA-bronchial aspirate; BL-bronchial lavage; BAL-bronchoalveolar lavage; EA-endotracheal aspirate. Molecular ID by  $\beta$ -tubulin sequencing.
